# Supplementary material for: Cis-motifs upstream of the transcription and translation initiation sites are effectively revealed by their positional disequilibrium in eukaryote genomes using frequency distribution curves
Source: PubMed Central journal article supplement (PMC1698937; doi:10.1186/1471-2105-7-522), 2006-11-30

# Size distribution of 5'UTRs

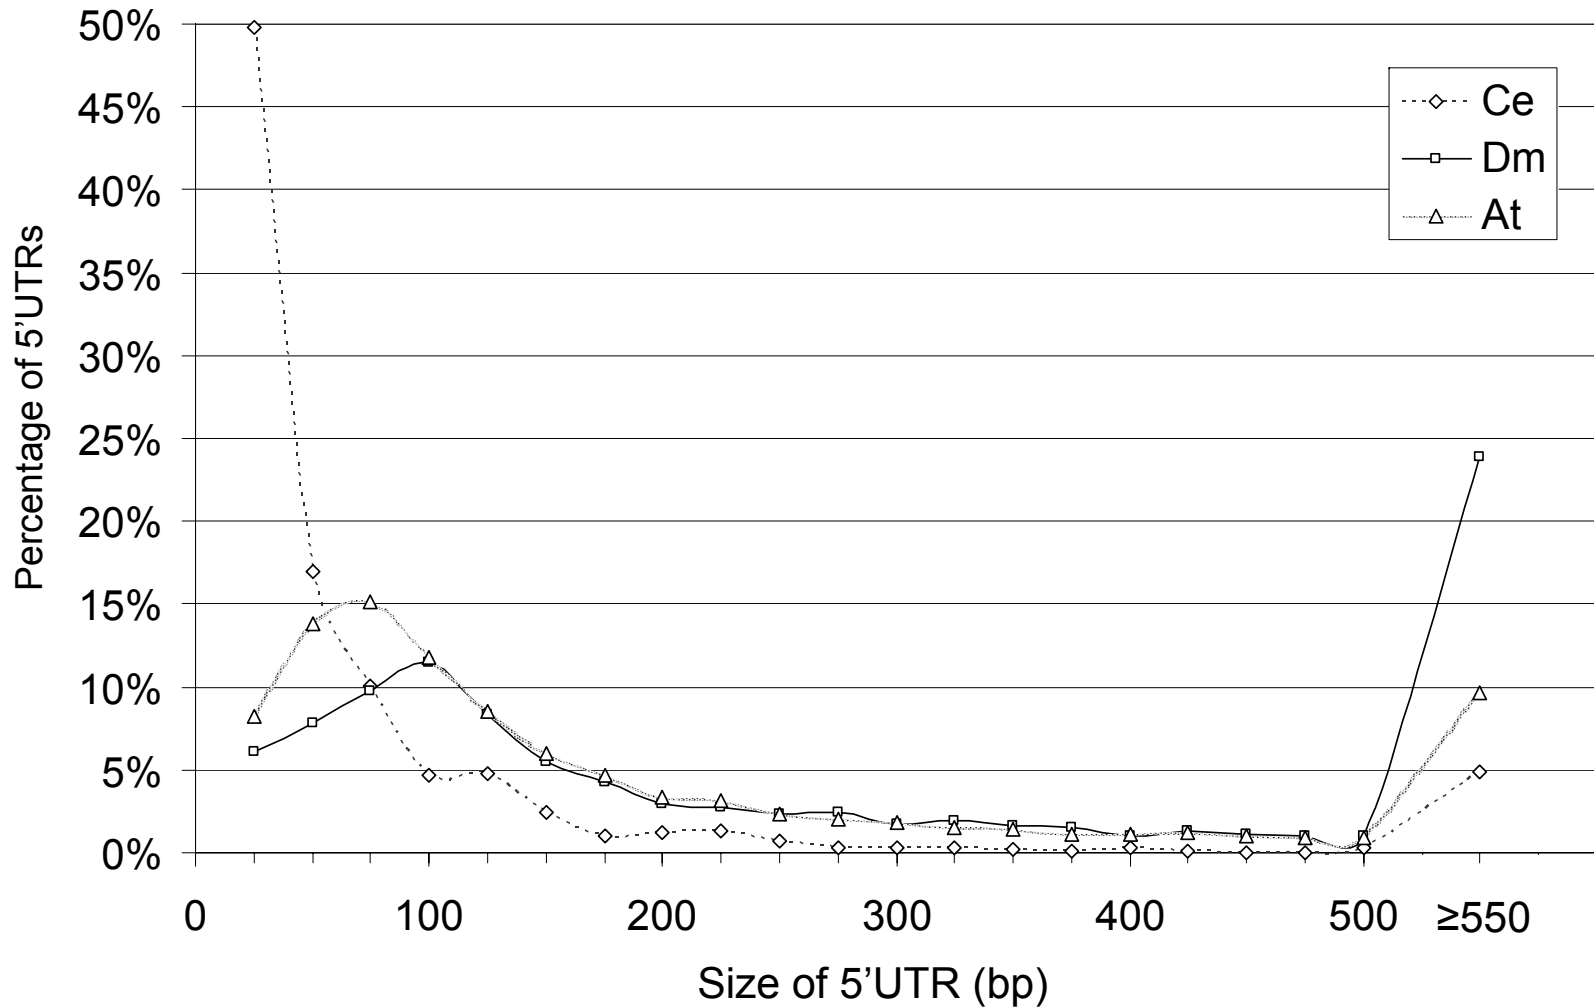

Supplement: 1471-2105-7-522-S2.pdf [file 1471-2105-7-522-S2.pdf]
