# Supplementary material for: Cis-motifs upstream of the transcription and translation initiation sites are effectively revealed by their positional disequilibrium in eukaryote genomes using frequency distribution curves
Source: PubMed Central journal article supplement (PMC1698937; doi:10.1186/1471-2105-7-522), 2006-11-30
Supplement: 1471-2105-7-522-S4.pdf [file 1471-2105-7-522-S4.pdf]

Retrieve sequences  
(ftp:// NCBI public sequences)

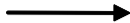

Promoter extraction  
(GBComplie; aGenBankSQL)

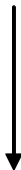

Align-promoter sets  
(StackerNtrimmer)

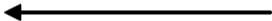

Generate Motif Lists  
(manually or  
automated; AllOligos)

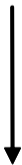

Map Motifs (Freq-dist curves)  
(PointMapper)

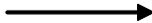

Score for Peaks and Valleys  
(visual inspection or  
pSUMscan)
